# Supplementary material
Source: publisher figshare collection journal article supplement (https://tandf.figshare.com/ndownloader/files/12272441)
Supplement: Supplementary file 1 [file 12272441]

# SUPPLEMENTAL DATA

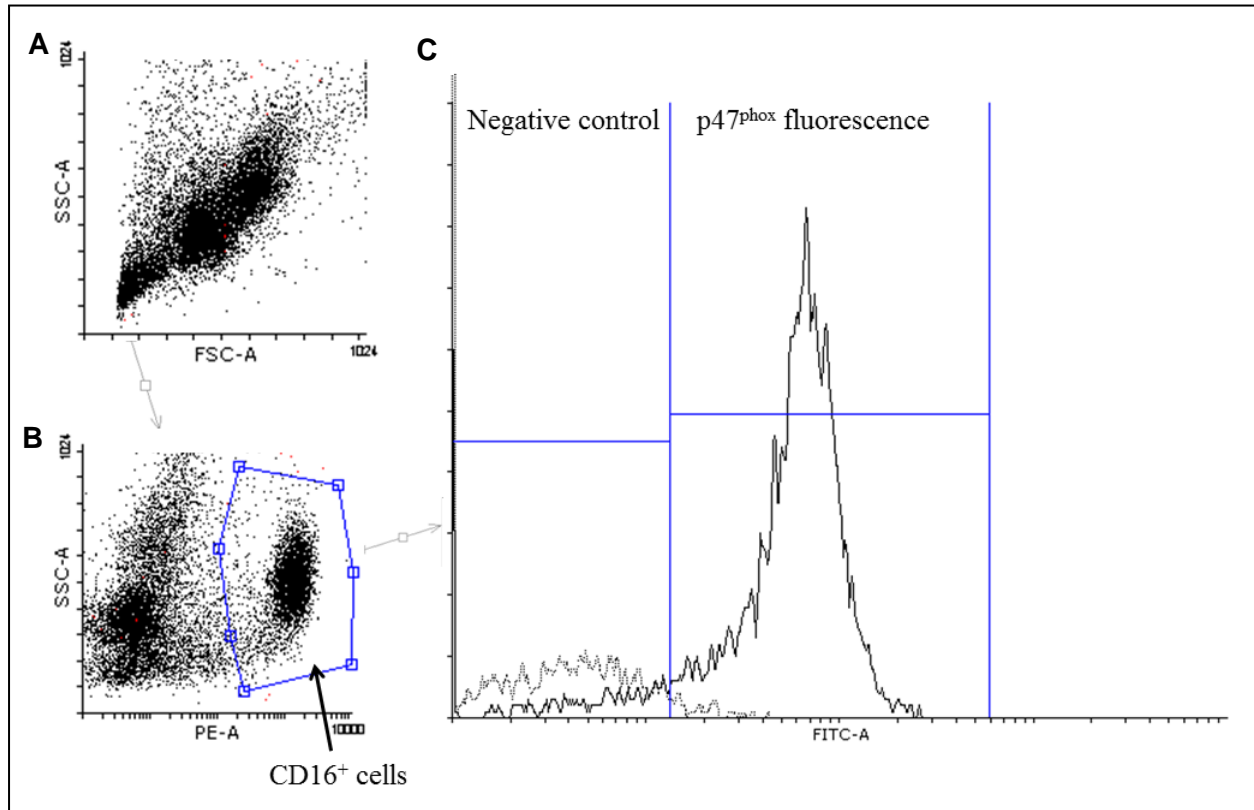

**Figure S1** - (A) Cell distribution according to forward- and side-scatter-area (FSC-A and SSC-A, respectively). (B) Dot plots displaying CD16<sup>+</sup> cells from anti-human CD16 conjugated with R-phycoerythrin (PE). (C) Histogram graphic showing p47<sup>phox</sup> fluorescence from anti-p47<sup>phox</sup> IgG1 conjugated to Fluorescein isothiocyanate (FITC) and negative control.
